# Supplementary material for: Regulation of Anthocyanin Biosynthesis by Drought and UV-B Radiation in Wild Tomato (Solanum peruvianum) Fruit
Source: MDPI journal article supplement (doi:10.3390/antiox11091639), 2022-08-24
Supplement: s1 [file s1]

**Table S1:** List of primers used for reverse transcription quantitative PCR (RT-qPCR) analyses.

| <b>Gene Name</b> | <b>Gene Description</b>         | <b>GenBank accession number</b> | <b>Forward primer</b>   | <b>Reverse primer</b>     |
|------------------|---------------------------------|---------------------------------|-------------------------|---------------------------|
| <i>AN2</i>       | Anthocyanin 2                   | ON568201                        | TTCCAGGAAGGACAGCAAAC    | AACGAGGACGAGAATGAGGA      |
| <i>DFR</i>       | Dihydroflavonol 4-reductase     | ON568202                        | CAAGGCAGAGGGAAGATTCATTG | GCACCATCTTAGCCACATCGTA    |
| <i>UBI-E4</i>    | Ubiquitin conjugation factor E4 | XM_004232138.4                  | AAGCAATGGATGCTGAGGCT    | GAAGGTGCCGTTGAATGACA      |
| <i>EF1-alpha</i> | Elongation factor1-alpha        | NM_001247106.2                  | TGCTTGCTTTCACCCTTGGT    | CGATTTCATCATACCTAGCCTTGGA |
